# Supplementary material for: Preparation of an Ni5P4/Ni porous composite using a Ni foam as the skeleton and its application in the treatment of large-volume effluent with a high concentration of 4-nitrophenol at room temperature
Source: Royal Society of Chemistry journal article supplement (doi:10.1039/c9nj01079c), 2019-01-01
Supplement: c9nj01079c1.pdf [file c9nj01079c1.pdf]

## Supplementary Data

# **Preparation of Ni<sub>5</sub>P<sub>4</sub>/Ni Porous Composite Using Ni Foam As Skeleton and Its Application in Restoration of Large Volume Effluent with A High Concentration of 4- Nitrophenol at Room Temperature**

Xing Liu, Xiaomeng Dou, Xiangqing Li, Lixia Qin, Sheng Han\*, Shi-Zhao Kang\*

*School of Chemical and Environmental Engineering, Shanghai Institute of  
Technology, 100 Haiquan Road, Shanghai 201418, China*

\* Corresponding author: Shi-Zhao Kang, Tel./fax: +86 21 60873061.

*E-mail address:* kangsz@sit.edu.cn (S.-Z. Kang)

Supplementary Fig. S1

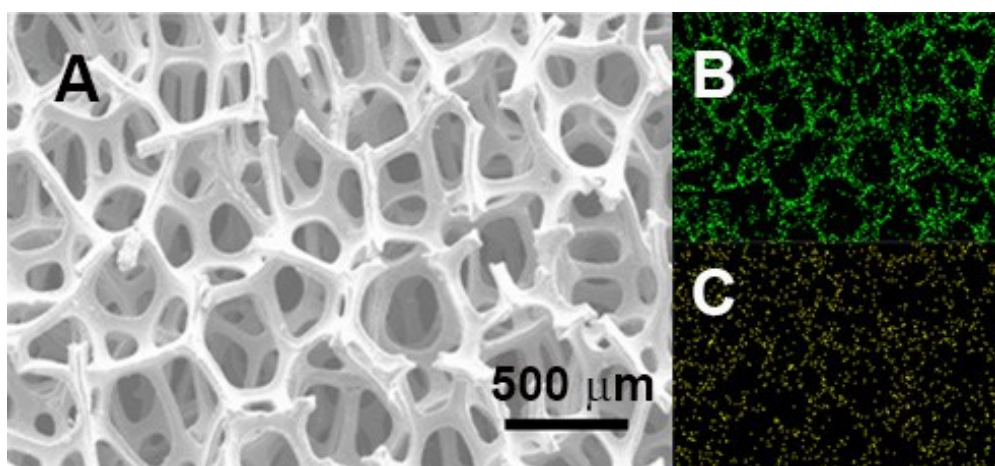

**Fig. S1.** (A) SEM image of Ni foam- $\text{Ni}_5\text{P}_4$  (30%), (B) elemental mapping of P element and (C) elemental mapping of Ni element.

Supplementary Fig. S2

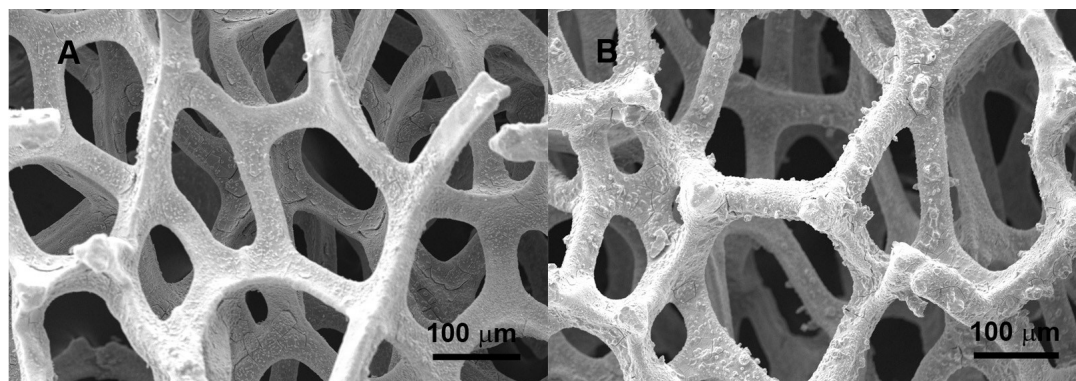

**Fig. S2.** SEM images of Ni foam-Ni<sub>5</sub>P<sub>4</sub> (30%) after (A) stretched and (B) curled.

Supplementary Fig. S3

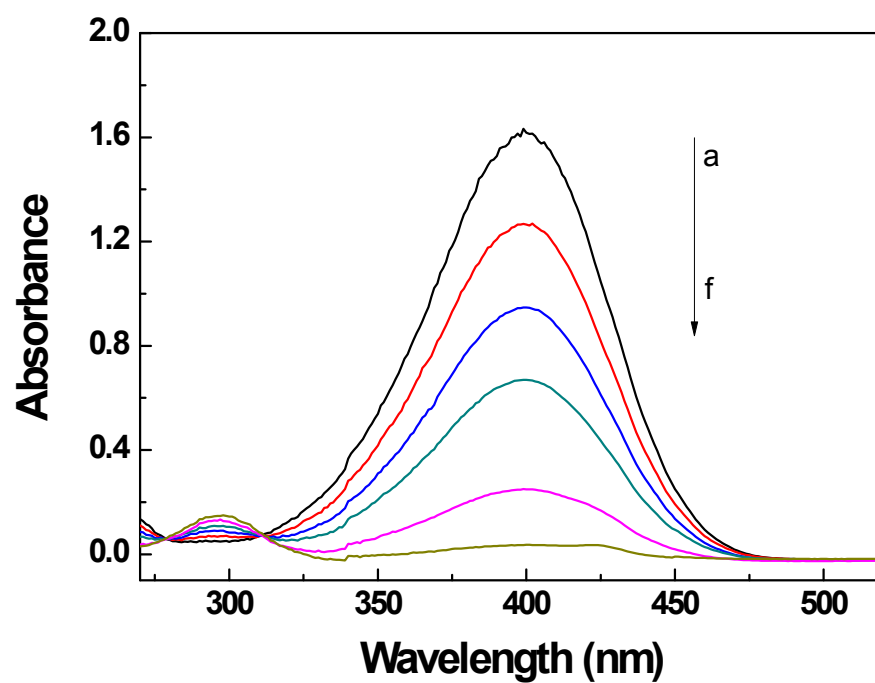

**Fig. S3.** Time-dependent UV-vis spectra of the solution containing 4-NP and NaBH<sub>4</sub> in the presence of Ni foam-Ni<sub>5</sub>P<sub>4</sub> (30%), (a) 0 min, (b) 5 min, (c) 9 min, (d) 13 min, (e) 24 min and (f) 36 min.

Supplementary Fig. S4

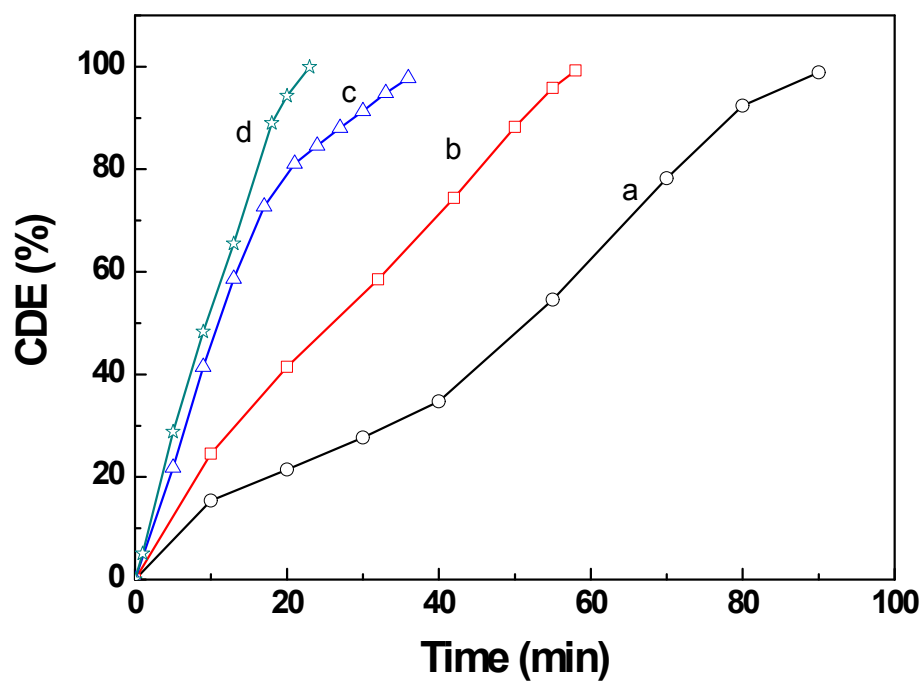

**Fig. S4.** Time-courses of catalytic 4-NP reduction over Ni foam-Ni<sub>5</sub>P<sub>4</sub> (30%), concentration of NaBH<sub>4</sub> (a) 0.06 mol L<sup>-1</sup>, (b) 0.08 mol L<sup>-1</sup> (c) 0.1 mol L<sup>-1</sup> and (d) 0.12 mol L<sup>-1</sup>, volume 100 mL.

Supplementary Fig. S5

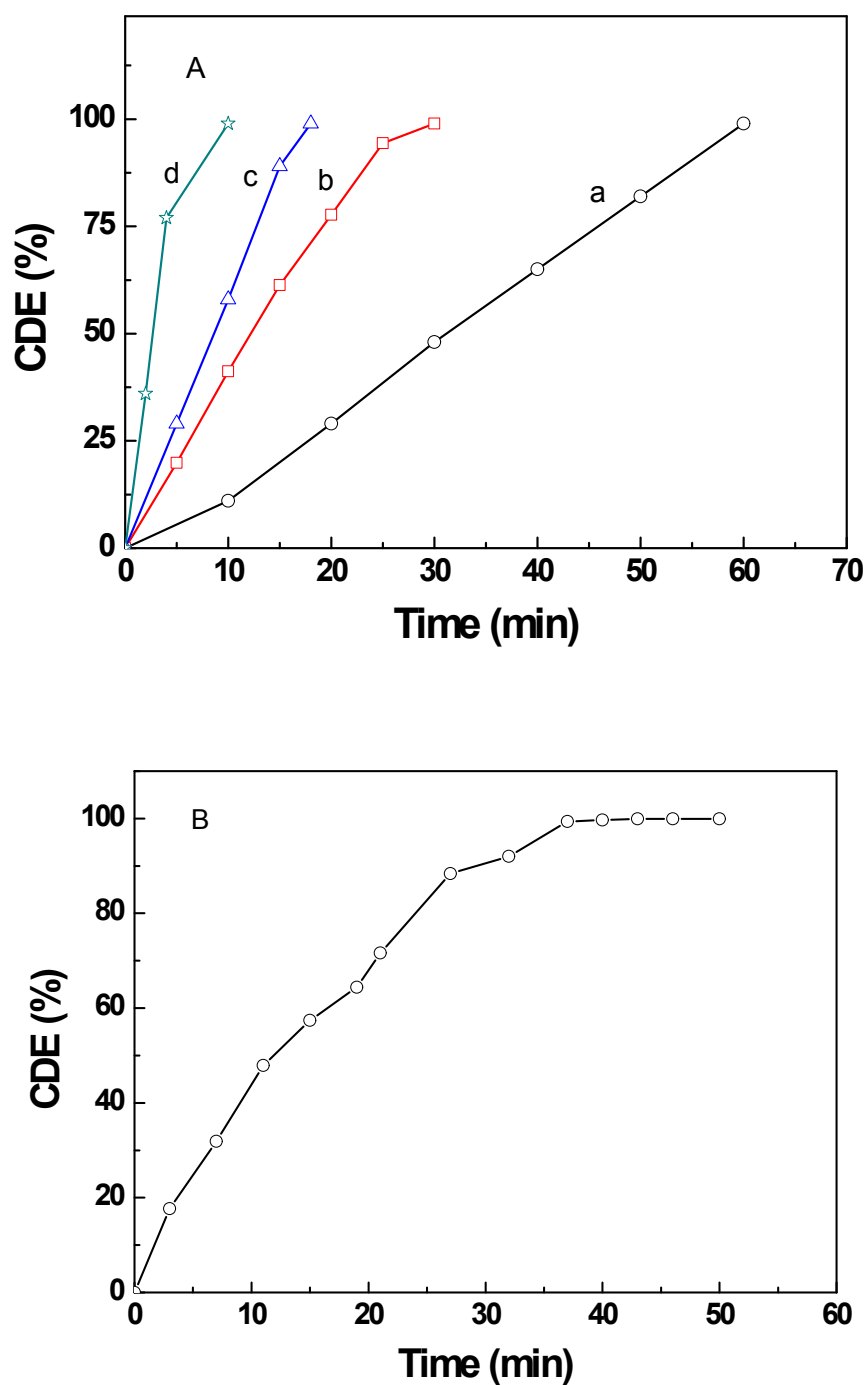

**Fig. S5.** (A) Time-courses of catalytic 4-NP reduction over Ni foam-Ni<sub>5</sub>P<sub>4</sub> (30%) at (a) 5°C, (b) 25°C, (c) 35°C and (d) 45°C; (B) time-course of catalytic 4-NP reduction in the presence of Ag nanoparticles at 45°C.

Supplementary Fig. S6

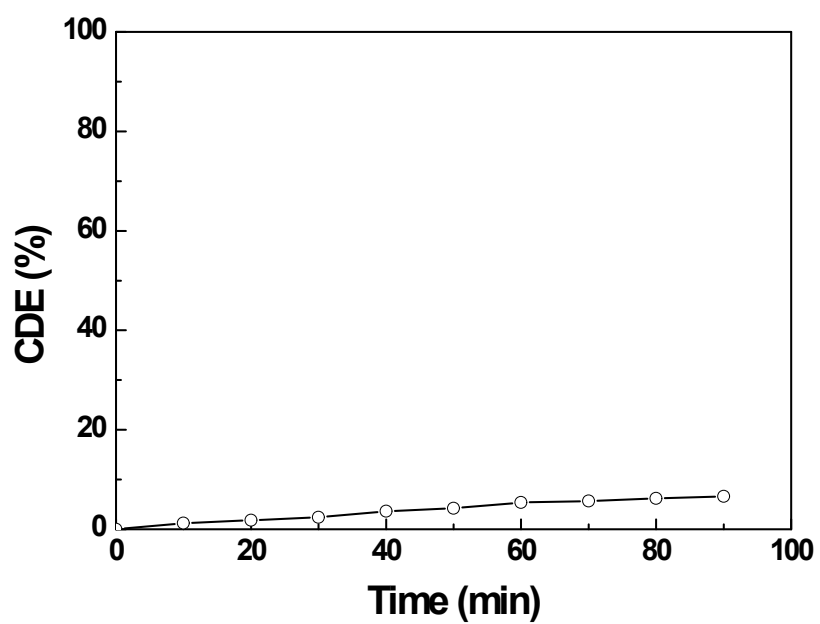

**Fig. S6.** Time-course of catalytic 4-NP reduction over the bare Ni foam.

Supplementary Fig. S7

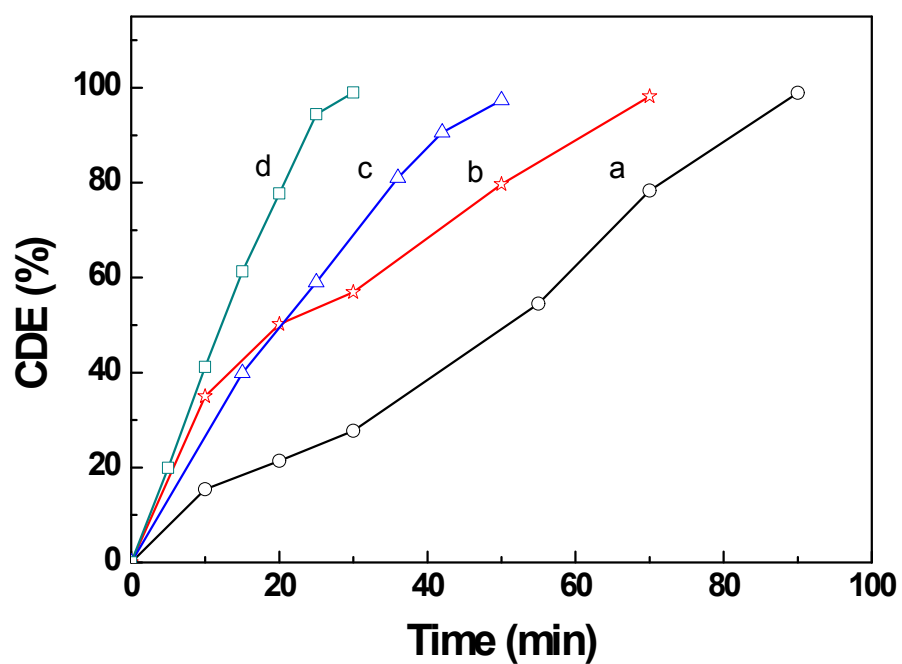

**Fig. S7.** Time-courses of catalytic 4-NP reduction over Ni foam-Ni<sub>5</sub>P<sub>4</sub> (30%) at stirring rate of (a) 200 r min<sup>-1</sup>, (b) 300 r min<sup>-1</sup>, (c) 400 r min<sup>-1</sup> and (d) 500 r min<sup>-1</sup>.



Supplementary Fig. S8

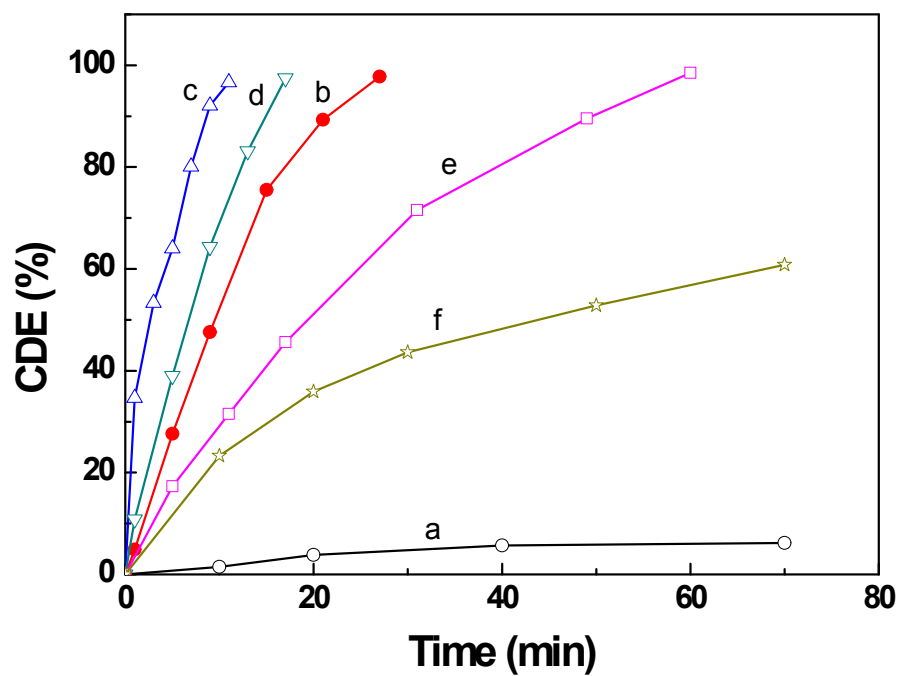

**Fig. S8.** Time-courses of catalytic 4-NP reduction over Ni foam-Ni<sub>5</sub>P<sub>4</sub> (30%) at pH = (a) 8.3, (b) 9.3, (c) 10.3, (d) 11.3, (e) 12.3 and (f) 13.3.
